# Supplementary material for: Transcriptome and proteome characterization of surface ectoderm cells differentiated from human iPSCs
Source: PubMed Central journal article supplement (PMC4994084; doi:10.1038/srep32007), 2016-08-23

**Title:** Transcriptome and proteome characterization of surface ectoderm cells differentiated from human iPSCs

**Authors:** Ying Qu<sup>1</sup>, Bo Zhou<sup>1</sup>, Wei Yang<sup>1</sup>, Bingchen Han<sup>1</sup>, Yi Yu-Rice<sup>1</sup>, Bowen Gao<sup>1</sup>, Jeffery Johnson<sup>1</sup>, Clive N. Svendsen<sup>2</sup>, Michael R. Freeman<sup>1</sup>, Armando E. Giuliano<sup>1</sup>, Dhruv Sareen<sup>2,3,4</sup>, Xiaojiang Cui<sup>1</sup>

## **Supplementary Information**

### **Supplementary Material and Methods**

#### **Human embryonic stem cell (hESC) culture**

hESCs were seeded on feeder-free system using BD Matrigel Matrix and maintained in chemically-defined mTeSR1 medium (Stem Cell Technologies Inc., Vancouver, Canada).

#### **qRT-PCR**

Total RNA was extracted using the RNeasy Mini Kit (Qiagen) according to the manufacturer's instructions. Reverse transcription was done using the QuantiTect Reverse Transcription Kit. The qRT-PCR assay was done using an iCycler iQ Real-Time Thermocycler (Bio-Rad Laboratories) as described and GAPDH was used as an internal control. The primers used in this study were listed in Supplementary Table 3. Fold change was calculated according delta delta Ct value. Bar graphs represent mean  $\pm$  SD (standard deviation) of three independent experiments.

#### **Chemicals**

BMP type I receptor inhibitor LDN-193189, non-selective BMP receptor inhibitor DMH1, TGF $\beta$  receptor type I/II inhibitor LY2109761, and TGF $\beta$  receptor type I inhibitor LY2157299 were

purchased from Cayman Chemical (Ann Arbor, MI, USA). The working concentration for each inhibitor was 500 nM, 1  $\mu$ M, 2  $\mu$ M, and 1  $\mu$ M, respectively<sup>1-3</sup>.

### References

- 1 Horbelt, D. *et al.* Small molecules dorsomorphin and LDN-193189 inhibit myostatin/GDF8 signaling and promote functional myoblast differentiation. *J Biol Chem* **290**, 3390-3404, doi:10.1074/jbc.M114.604397 (2015).
- 2 Neely, M. D. *et al.* DMH1, a highly selective small molecule BMP inhibitor promotes neurogenesis of hiPSCs: comparison of PAX6 and SOX1 expression during neural induction. *ACS Chem Neurosci* **3**, 482-491, doi:10.1021/cn300029t (2012).
- 3 Yamasaki, A. *et al.* Identification of the role of bone morphogenetic protein (BMP) and transforming growth factor-beta (TGF-beta) signaling in the trajectory of serotonergic differentiation in a rapid assay in mouse embryonic stem cells in vitro. *J Neurochem* **132**, 418-428, doi:10.1111/jnc.12999 (2015).

### Supplementary Figure Legends

**Supplementary Figure 1. LifeMap online database analysis of upstream signals and downstream effectors.** P63 (a) and BMP4 (b) are the upstream regulators directing SE differentiation, while Mir450b (c) is the upstream regulator inhibiting neural ectoderm differentiation from intraembryonic ectoderm cells.

**Supplementary Figure 2. SE differentiation from human embryonic stem cell (hESC) line H9.** (a) Western blotting analysis of KRT8, 18, and 19 expression in control hiPSCs and

differentiated SE cells. Actin was used as loading control. **(b)** Cell morphologies of control hESC line H9 and differentiated SE cells. Original magnification  $\times 100$ . Bars:  $100\mu\text{m}$ . **(c)** Immunofluorescence staining of SE markers KRT8, KRT18, KRT19, p63, AP-2 $\alpha$ , AP-2 $\gamma$ , ALDH1A3, p-SMAD1/5/9, CDH1, Desmoglein 3 and FOXG1 endodermal marker AFP, Mesodermal marker Brachyury (T), and neural ectoderm marker OTX2 in control H9 and H9-derived SE cells. DAPI was used to stain nuclei. The secondary antibodies Alexa -488 and Alexa -594 were used to visualize green and red signals, respectively. Original magnification  $\times 200$ . Bars:  $50\mu\text{m}$ .

**Supplementary Figure 3. Comparison of SE and NE differentiation at different time points.**

**(a)** qRT-PCR results of selected up- and down-regulated genes from cDNA microarray analysis. Relative gene expression levels (SE vs. hiPSCs or SE vs. hESCs, mean  $\pm$  SD) are plotted. **(b)** Morphologies of SE induced from iPSCs at 48h and 72h time points are shown. Original magnification  $\times 200$ . Bars:  $100\mu\text{m}$ . cDNA microarray analysis was conducted using iPSCs treated with vehicle (control), 48h SE induction (2d-SE), and 72h SE induction (3d-SE). Genes differentially expressed in 2d-SE vs. control and 3d-SE vs. control were identified. IPA was then employed to analyze the correlation of canonical pathways **(c)**, bio-functions **(d)**, and upstream regulators **(e)** between 2d-SE and 3d-SE. **(f)** Morphologies of iPSCs and NE cells are shown. Original magnification  $\times 100$ . Bars:  $100\mu\text{m}$ . **(g)** Western blotting of neural and SE marker expression representing SE and neural differentiation. GAPDH was used as loading control. SE: surface ectoderm cells. C: vehicle control (iPSCs). N: NE differentiation.

**Supplementary Figure 4. Comparison of SE cells and NE cells using IPA.** **(a)** Canonical pathway analysis using IPA shows most significant up- and down-regulated pathways in SE compared to NE cells. Activation z-score (top) and  $-\log$  (p-value) (bottom) are shown. **(b)** Bio-

function analysis using IPA shows most significant up- and down-regulated bio-functions in SE compared to NE cells. Activation z-score (top) and  $-\log$  (p-value) (bottom) are shown. **(c)** Upstream Regulator Analysis in IPA is a tool that predicts upstream regulators from gene expression data based on the literature and compiled in the Ingenuity Knowledge Base. A Fisher's Exact Test p-value is calculated to assess the significance of enrichment of the gene expression data for the genes downstream of an upstream regulator. Dot plot showed the upstream regulators in SE (X-axis) vs. NE (Y-axis), respectively. Pearson's correlation coefficient was calculated. **(d)** Mechanistic network analysis showed the down-regulation of TGF $\beta$  superfamily, Wnt/ $\beta$ -catenin, and NF- $\kappa$ B signaling pathways in NE cells.

**Supplementary Figure 5 Effects of inhibiting TGF $\beta$  superfamily activity in SE differentiation.** **(a)** Cell morphologies in control, SE, and SE with inhibitors. hiPSCs and hESCs were treated with (BMP4+DAPT) or (BMP4+DAPT) and indicated inhibitors for 48h. Representative pictures are shown. Original magnification  $\times 100$ . Bars: 100  $\mu$ m. Left panel: hiPSCs. Right panel: hESCs. **(b)** Western blotting analysis of marker expression in control, SE and SE with inhibitors. Top panel: hiPSCs. Bottom panel: hESCs. Actin was used as loading control.

**Supplementary Figure 6. Western blotting images for Fig. 6.** The gels have been run under the same experimental conditions.

## Supplementary Tables

**Supplementary Table 1** SE-associated genes summarized in LifeMap Discovery Database

| Species | Gene Symbol         | Full Name                                              | Expression | Localization | Method(s)                   | Validation |
|---------|---------------------|--------------------------------------------------------|------------|--------------|-----------------------------|------------|
| m       | <b>Foxg1 (Bf1)</b>  | <b>forkhead box G1</b>                                 | ++         | intra        |                             |            |
| m       | <b>Krt18 (K18)</b>  | <b>keratin 18</b>                                      | ++         | intra        | IS                          | P          |
| m       | <b>Krt8</b>         | <b>keratin 8</b>                                       | ++         | intra        | IS                          | P          |
| m       | <b>Trp63 (P63)</b>  | <b>transformation related protein 63</b>               | ++         | intra        | KO                          | RP         |
| m       | <b>Pax6</b>         | <b>paired box 6</b>                                    | -          | intra        |                             | P          |
| m       | Aldh1a3<br>(RALDH3) | aldehyde dehydrogenase family 1, subfamily A3          | +          | intra        | ISH, IS                     | RP         |
| m       | Arhgap31            | Rho GTPase activating protein 31                       | +          | intra        | ISH, IS                     | RP         |
| h       | BMP2                | bone morphogenetic protein 2                           | +          | secreted     | ISH                         | R          |
| h       | Bmp7 (OP1)          | bone morphogenetic protein 7                           | +          | secreted     | ISH, IS                     | RP         |
| m       | BMP7                | bone morphogenetic protein 7                           | +          | secreted     | ISH                         | R          |
| ch      | DLX5                | distal-less homeobox 5                                 | +          | intra        | IS                          | P          |
| m       | Epcam               | epithelial cell adhesion molecule                      | +          | surface      |                             |            |
| m       | Fgf10               | fibroblast growth factor 10                            | +          | secreted     | ISH, IS                     | RP         |
| m       | Fgf8                | fibroblast growth factor 8                             | +          | secreted     | ISH, IS                     | RP         |
| m       | Fgf9                | fibroblast growth factor 9                             | +          | secreted     | ISH, IS                     | RP         |
| m       | Fgfr2 (Fgfr-2)      | fibroblast growth factor receptor 2                    | +          | surface      | ISH, IS                     | RP         |
| m       | Fn1 (Fn-1)          | fibronectin 1                                          | +          | secreted     | ISH, KO                     | RP         |
| m       | Gata1               | GATA binding protein 1                                 | +          | intra        |                             |            |
| ch      | GATA2               | GATA binding protein 2                                 | +          | intra        | IS                          | P          |
| h       | GRHL2               | grainyhead-like 2 (Drosophila)                         | +          | intra        |                             |            |
| m       | Grhl3               | grainyhead-like 3 (Drosophila)                         | +          | intra        | ISH, IS                     | RP         |
| h       | GRHL3               | grainyhead-like 3 (Drosophila)                         | +          | intra        |                             |            |
| m       | Krt14 (K14)         | keratin 14                                             | +          | intra        | ISH, IS,<br>Transgenic Mice | RP         |
| m       | Ltb                 | lymphotoxin B                                          | +          | surface      | Transgenic Mice             | RP         |
| m       | Mir450b             | microRNA 450b                                          | +          |              | ISH                         | R          |
| m       | Msx1 (Hox7)         | msh homeobox 1                                         | +          | intra        | ISH, IS                     | RP         |
| ch      | MSX1                | msh homeobox 1                                         | +          | intra        | IS                          | P          |
| ch      | MSX2 (HOX-8)        | msh homeobox 2                                         | +          | intra        | IS                          | P          |
| m       | Nedcd4              | neural precursor cell expressed, developmentally down- | +          | intra        | ISH, IS                     | RP         |

regulated 4

|   |                   |                                      |   |         |         |    |
|---|-------------------|--------------------------------------|---|---------|---------|----|
| m | Notch2            | notch 2                              | + | surface | ISH, IS | RP |
| m | Otx2              | orthodenticle homolog 2              | + | intra   | ISH, IS | RP |
| m | Perp              | PERP, TP53 apoptosis effector        | + | surface | KO      | RP |
| m | Pmel              | premelanosome protein                | + | surface | ISH, IS | RP |
| m | Pth1r (Pthr1)     | parathyroid hormone 1 receptor       | + | surface | ISH, IS | RP |
| m | Smad1             | SMAD family member 1                 | + | intra   |         | P  |
| m | Smad5             | SMAD family member 5                 | + | intra   |         |    |
| m | Smad9 (Smad8)     | SMAD family member 9                 | + | intra   |         |    |
| m | Sox2              | SRY (sex determining region Y)-box 2 | + | intra   | ISH, IS | RP |
| m | Tfap2c (AP2gamma) | transcription factor AP-2, gamma     | + | intra   |         |    |
| m | Zmiz1             | zinc finger, MIZ-type containing 1   | + | intra   | ISH, IS | RP |

Notes: ++, database-selected marker; -, undetected; +, expressed.

Intra: intra cellular; surface: cell surface

IS: immunostaining; ISH: in situ hybridization

P: protein; R: RNA

**Supplementary Table 2** Differentially expressed genes in neural and non-neural ectoderm-GXD database analysis

| <b>MGI Gene ID</b> | <b>Gene Symbol</b> | <b>Gene Name</b>                                             | <b>Assay Type</b>                  | <b>Age</b>  | <b>Theiler Stage</b> | <b>Structure Detected</b>  | <b>PubMed ID</b>  |
|--------------------|--------------------|--------------------------------------------------------------|------------------------------------|-------------|----------------------|----------------------------|-------------------|
| MGI:1914071        | Bcs1l              | BCS1-like (yeast)                                            | Immunohistochemistry               | E7.0        | 10                   | neural ectoderm            | Yes 17049929      |
| MGI:88180          | Bmp4               | bone morphogenetic protein 4 cadherin, EGF                   | RNA in situ                        | E7.25       | 10                   | neural ectoderm            | Yes 19393343      |
| MGI:1858235        | Celsr2             | LAG seven-pass G-type receptor 2                             | RNA in situ                        | E6.75       | 10                   | neural ectoderm            | Yes 11677057      |
| MGI:1933172        | Chrdl1             | chordin-like 1                                               | RNA in situ                        | E7.0        | 10                   | neural ectoderm            | Yes 11118896      |
| MGI:1890077        | Foxo1              | forkhead box O1                                              | In situ reporter (knock in)        | E7.0        | 10                   | neural ectoderm            | Yes 21397048      |
| MGI:1861942        | Gtf2ird1           | general transcription factor II I repeat domain-containing 1 | Immunohistochemistry               | E7.0        | 10                   | neural ectoderm            | Yes 12971990      |
| MGI:96071          | Hesx1              | homeobox gene expressed in ES cells                          | RNA in situ                        | E7.0        | 10                   | neural ectoderm            | Yes 10882526      |
| MGI:96071          | Hesx1              | homeobox gene expressed in ES cells                          | RNA in situ                        | E7.5        | 10                   | neural ectoderm            | Yes 8565852       |
| MGI:1930187        | Maged1             | melanoma antigen, family D, 1                                | Western blot                       | E7.0        | 10                   | neural ectoderm            | Yes 12204258      |
| MGI:97486          | Pax2               | paired box 2                                                 | RNA in situ                        | E7.5-8.0    | 10                   | neural ectoderm            | Yes 7577673       |
| MGI:109295         | Sall3              | sal-like 3 (Drosophila)                                      | RNA in situ                        | E7.0        | 10                   | neural ectoderm            | Yes 8798152       |
| MGI:101877         | Tcf12              | transcription factor 12                                      | RNA in situ                        | E7.0        | 10                   | neural ectoderm            | Yes 15018808      |
| MGI:1194497        | Tgif1              | TGFB-induced factor homeobox 1                               | RNA in situ                        | E7.0        | 10                   | neural ectoderm            | Yes 16284942      |
| MGI:2135272        | Vangl2             | vang-like 2 (van gogh, Drosophila)                           | RNA in situ                        | E7.0-7.5    | 10                   | neural ectoderm            | Yes 11431695      |
| <b>MGI:97451</b>   | <b>Otx2</b>        | <b>orthodenticle homolog 2</b>                               | <b>In situ reporter (knock in)</b> | <b>E7.0</b> | <b>10</b>            | <b>non-neural ectoderm</b> | <b>No 7588062</b> |

**Supplementary Table 3** Primers used in this study

|        | Forward                | Reverse               |
|--------|------------------------|-----------------------|
| TFAP2C | CAGATGGACGAGGTGCAGAATG | GGGGAGG TTCAGAGGGTTCT |
| TFAP2A | GGAGGTCCCGCATGTAGAAG   | CGACCCGGA ACTGAACAGAA |
| KRT8   | GCTGGTGGAGGACTTCAAGA   | AGCTCCCGGATCTCCTCTTC  |
| KRT18  | GATCATCGAGGACCTGAGGG   | ATCAATGACCTTGCGGAGCC  |
| KRT19  | CTACACGACCATCCAGGACC   | TCCGTCTCAA ACTTGGTTCG |
| OTX2   | CCCGGTACCCAGACATCTTC   | GCGGCACTTAGCTCTTCGAT  |
| TUBB3  | GAGACAGGTACAGGTCCACG   | AGGCACGTACTTGTGAGAAGA |
| FOXA2  | CGTTCCGGGTCTGAACTGT    | CATGTTGCTCACGGAGGAGT  |
| ACTA1  | CACGATGTACCCTGGGATCG   | GCCGATCCACACCGAGTATT  |
| ID1    | AATCATGAAAGTCGCCAGTG   | ATGTCGTAGAGCAGCACGTTT |
| ID2    | CCGTGAGGTCCGTTAGGAAA   | GAGCTTGGAGTAGCAGTCGT  |
| P63    | TGGTGCGACAAACAAGATTG   | ATAGGGACTGGTGGACGAGG  |
| MSX2   | TGGATGCAGGAACCCGG      | AGGGCTCATATGTCTTGGCG  |
| NFKB1  | GCTTAGGAGGGAGAGCCCA    | TATGGGCCATCTGTTGGCAG  |



Fig.S1

a

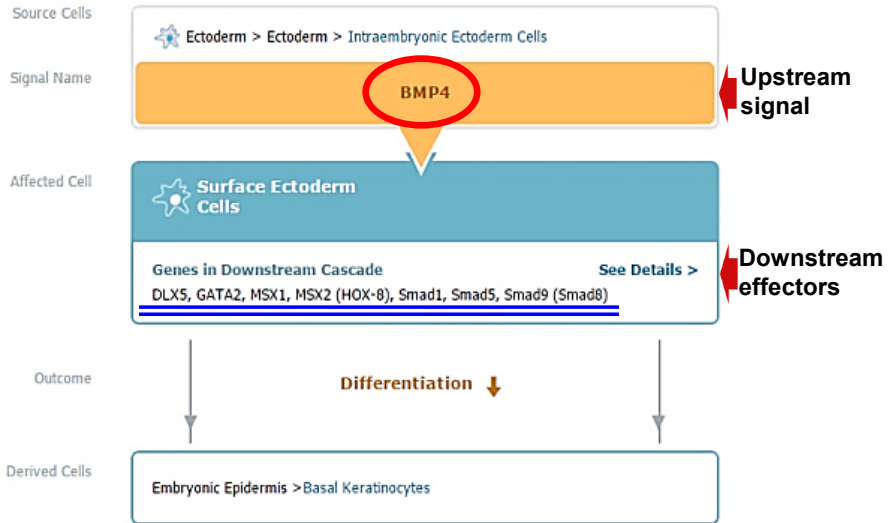

b

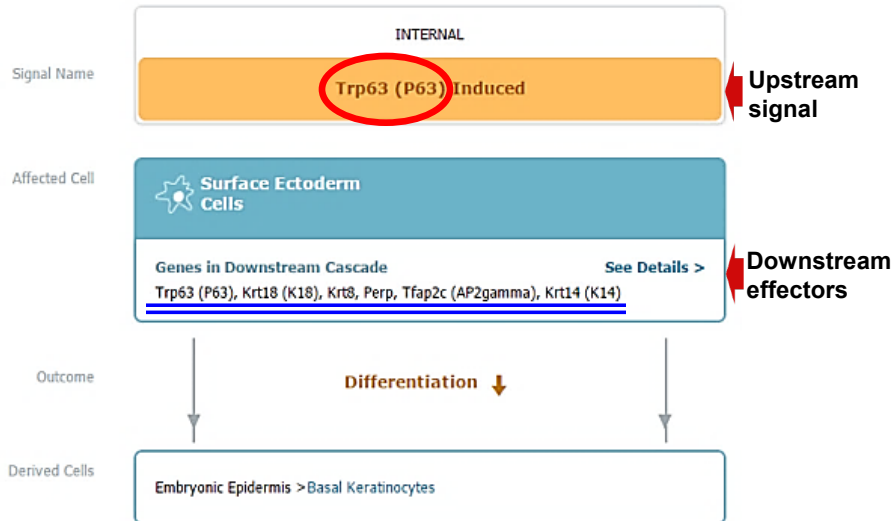

c

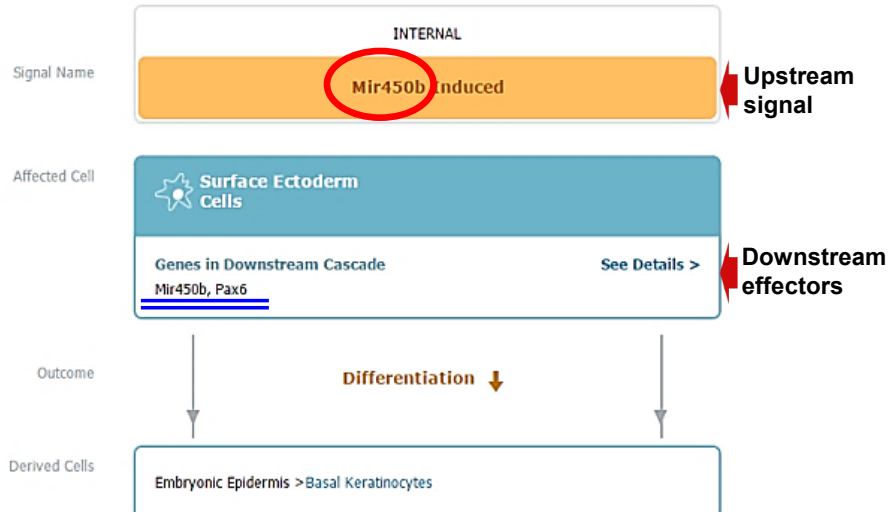

Fig.S2

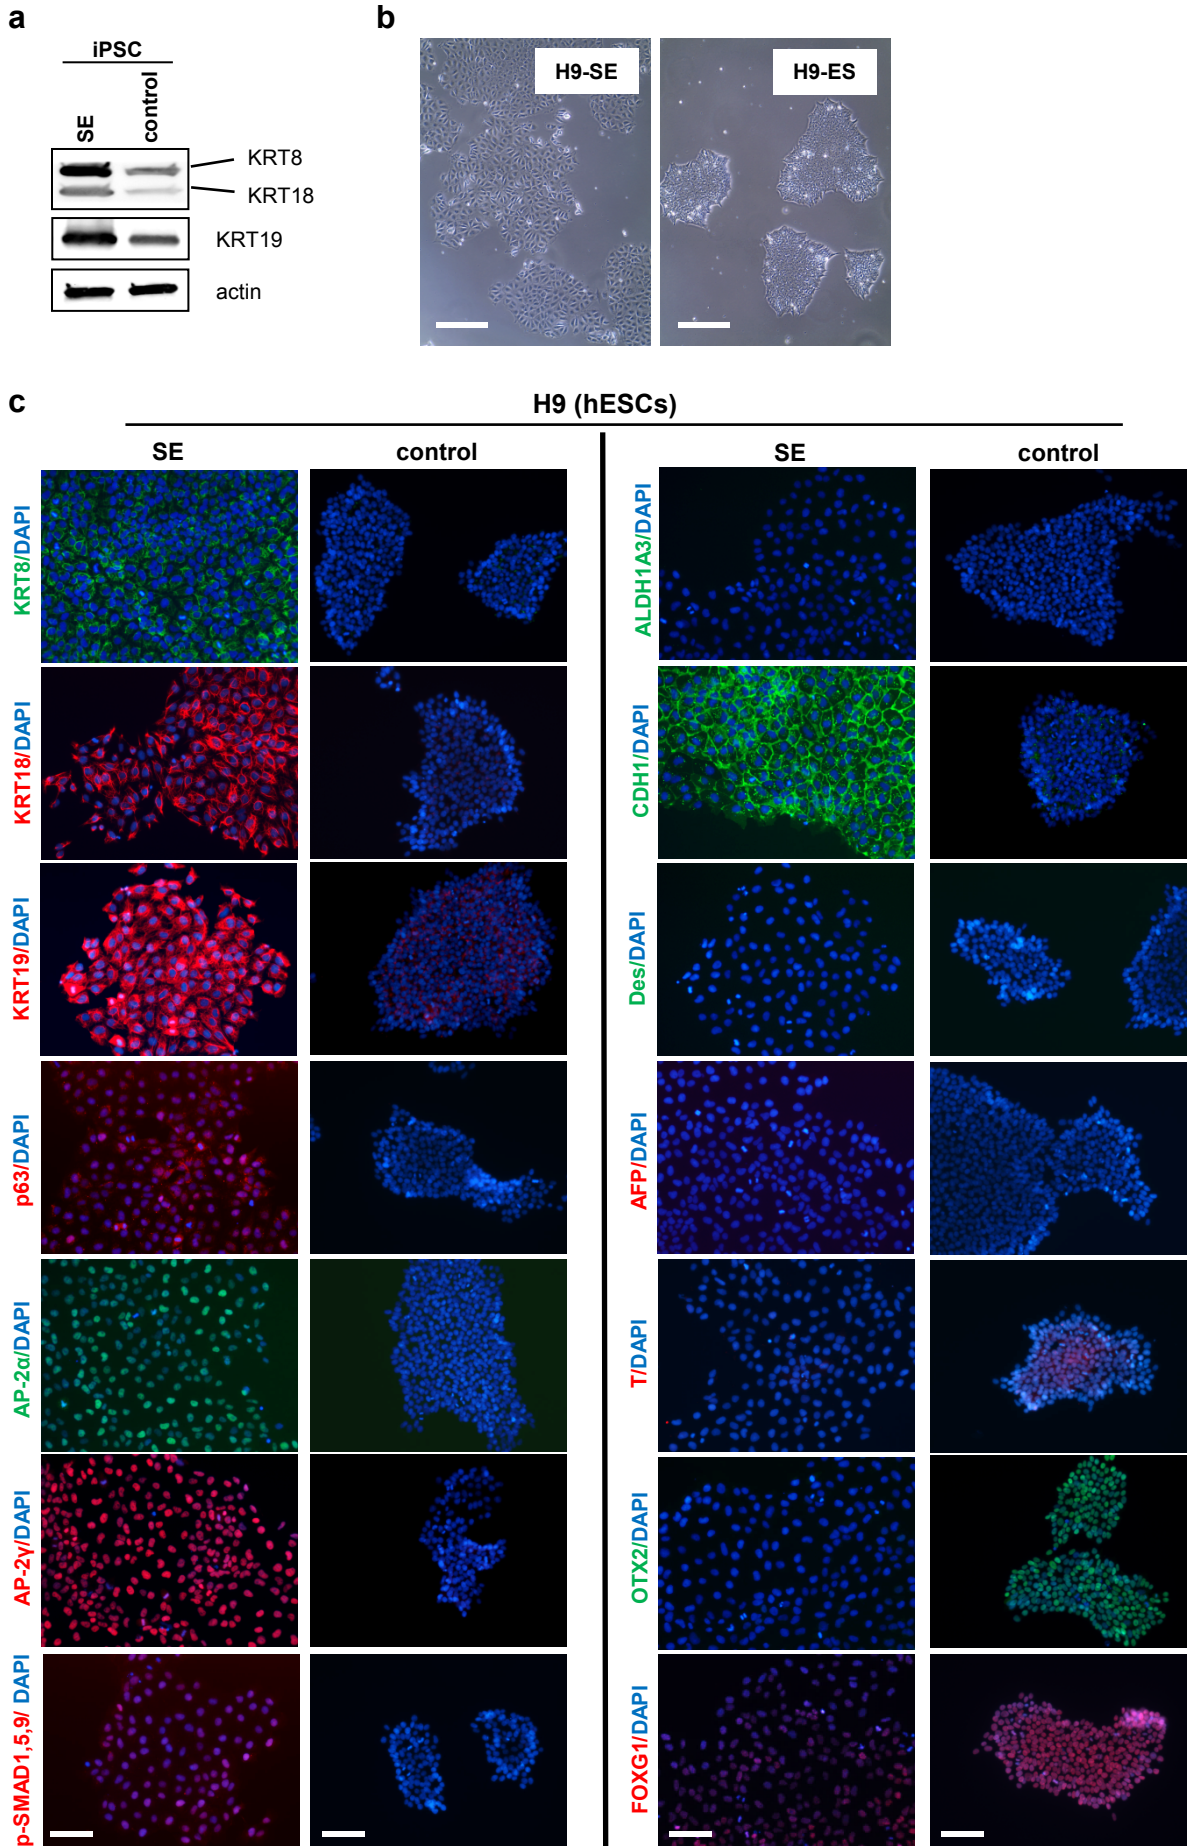

Fig.S3

a

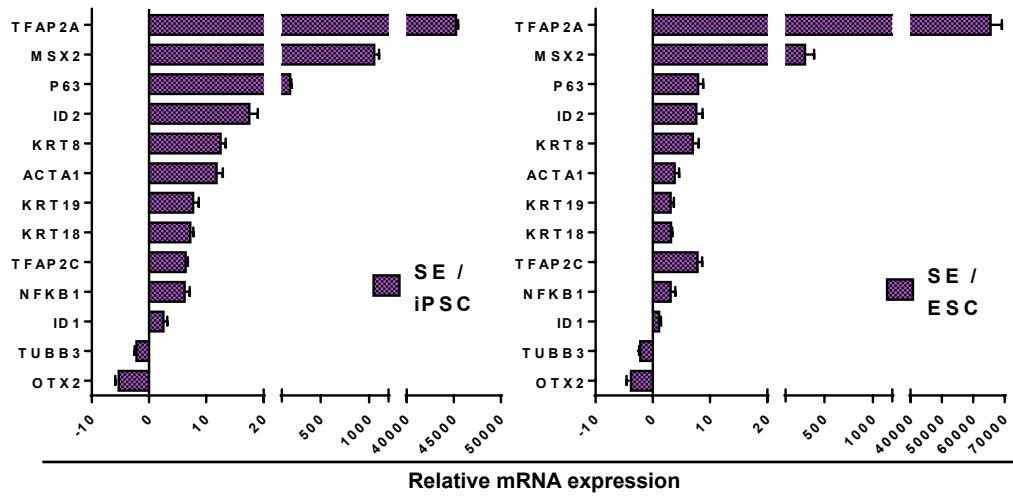

b

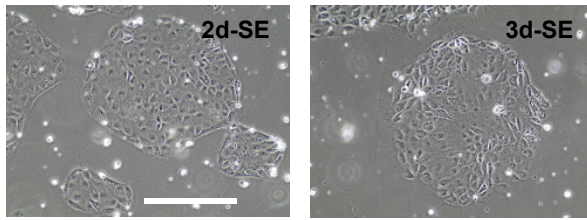

c

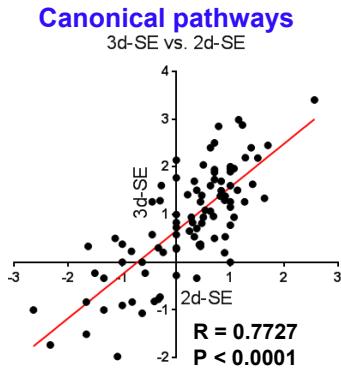

d

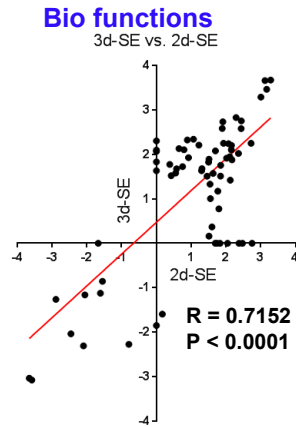

e

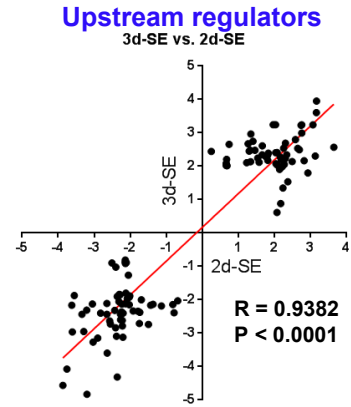

f

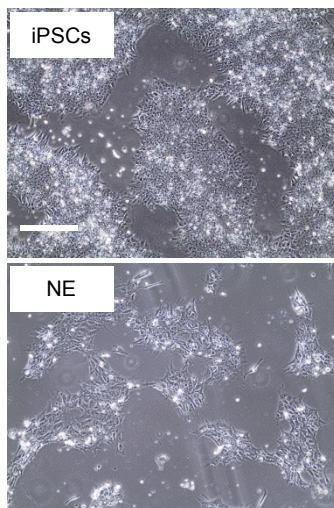

g

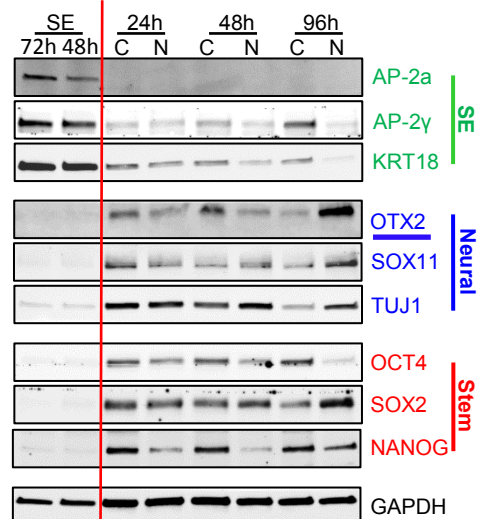



Fig.S5

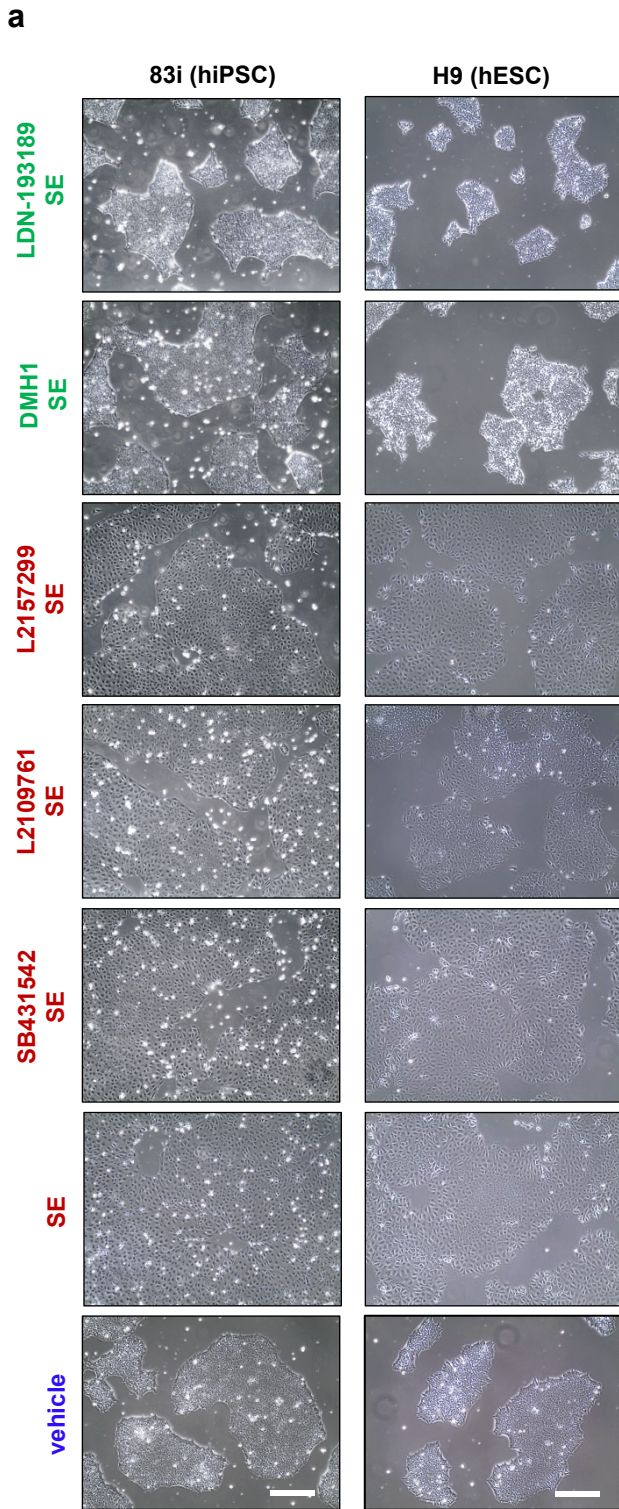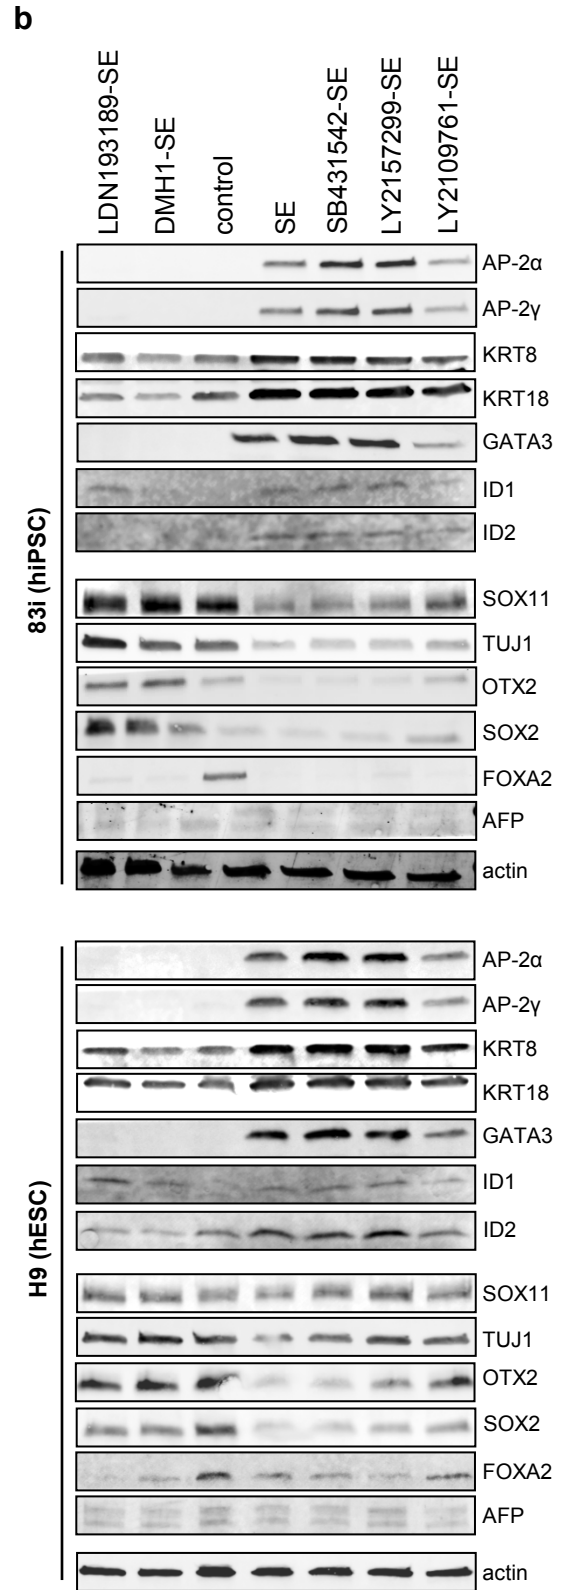

Fig.S6

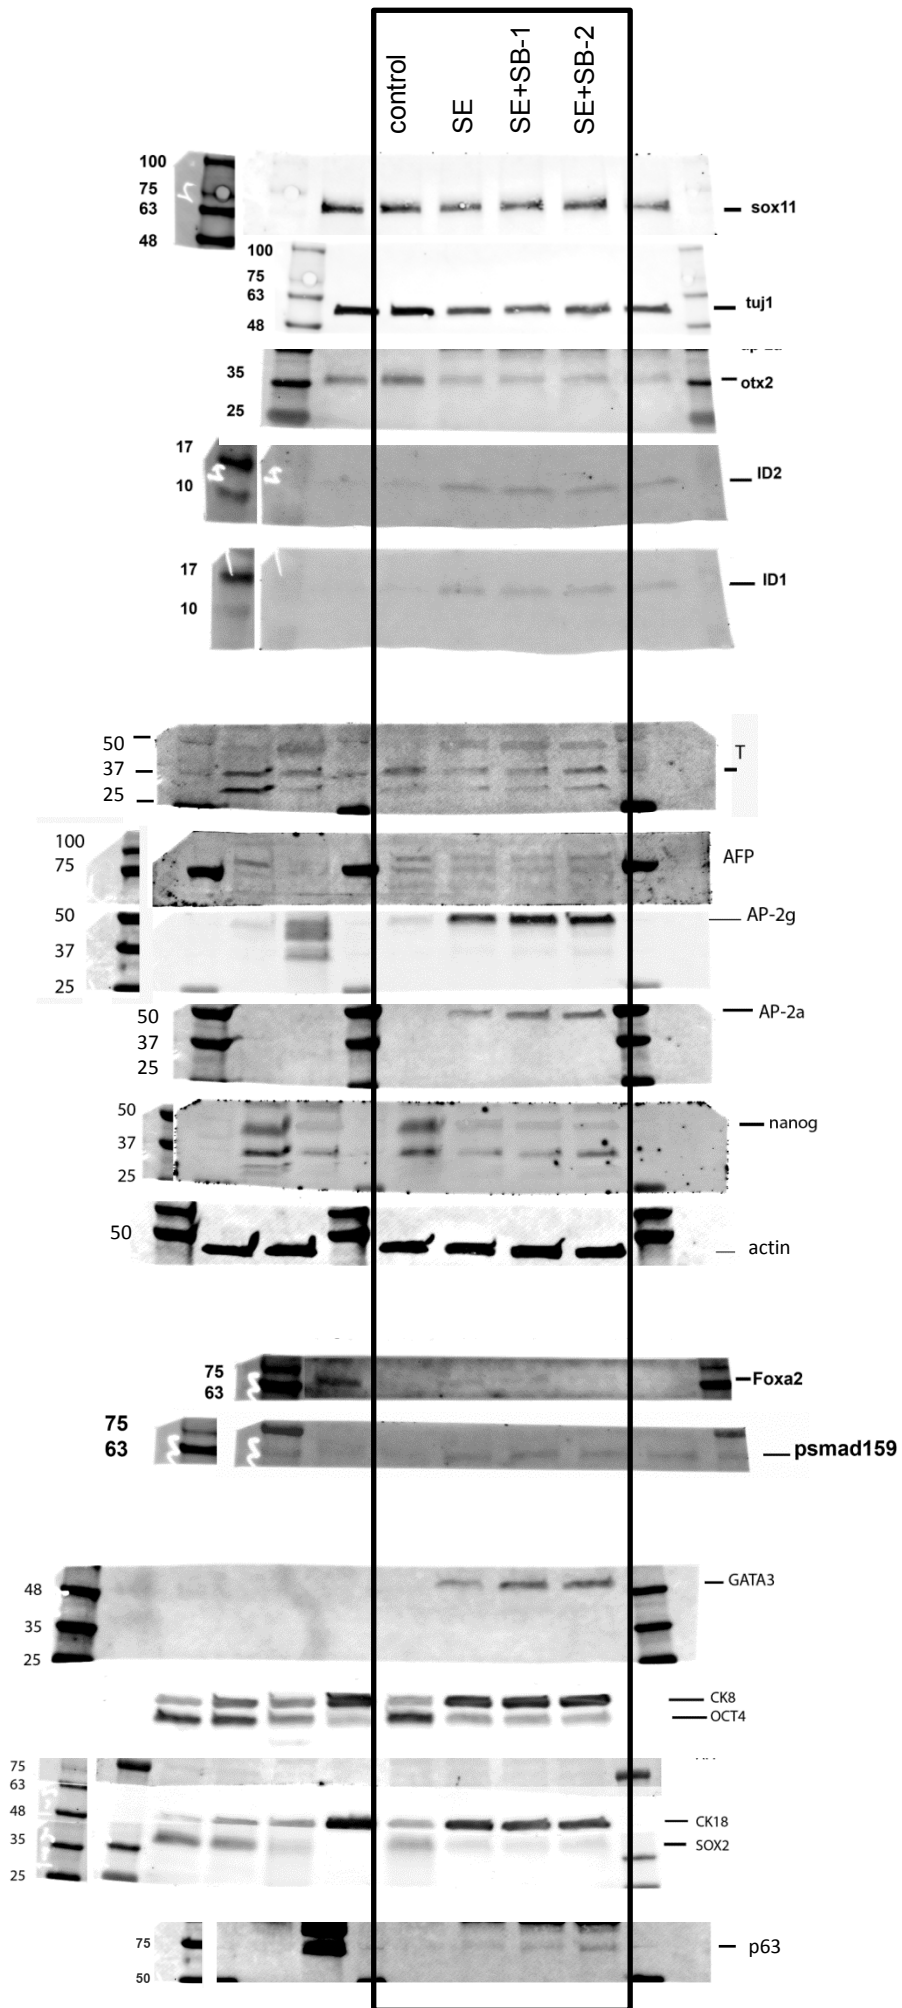

Supplement: srep32007-s1.pdf [file srep32007-s1.pdf]
